# Supplementary material for: The value of 18F-FDG PET/CT for the diagnosis of device-related infections in patients with a left ventricular assist device: a systematic review and meta-analysis
Source: Springer Nature journal article supplement (doi:10.1007/s00259-020-04930-8), 2020-06-27
Supplement: MOESM1 [file 18124630]

## Supplemental Data

### **Includes:**

Tables 4, 5

Figures 6 - 10

Search string for Embase and Pubmed

### **Legend for tables and figures:**

FDG-PET/CT: 18F-fluorodeoxyglucose positron emission tomography / computed tomography; DOR: diagnostic odds ratio; INTERMACS: interagency registry for mechanical circulatory support; MMB = medical microbiology; MV: metabolic volume (Cut-off:  $\geq 9\text{cm}^3$ ) NLR: negative likelihood ratio; PLR: positive likelihood ratio.

In studies where there was insufficient data for assessment of true/false positives and negatives, these were left blank.





Figure 6. NLR and PLR Forest plots for FDG PET/CT for infection of LVAD pump/pocket

Negative Likelihood Ratio

| Studies                                      | Estimate (95% C.I.)         | (FN * Di-)/(TN * Di+) |
|----------------------------------------------|-----------------------------|-----------------------|
| Akin 2018                                    | 0.108 (0.007, 1.582)        | 0/24                  |
| Bernhardt 2017                               | 0.255 (0.016, 4.123)        | 24/120                |
| Dell Aquila 2018                             | 0.216 (0.099, 0.473)        | 135/624               |
| De Vaugelade 2019                            | 0.101 (0.038, 0.270)        | 0/80                  |
| Kim 2019                                     | 0.022 (0.001, 0.328)        | 0/276                 |
| Tam 2019                                     | 0.101 (0.057, 0.180)        | 0/40                  |
| <b>Overall (I<sup>2</sup>=0 % , P=0.486)</b> | <b>0.122 (0.082, 0.183)</b> | <b>159/1164</b>       |

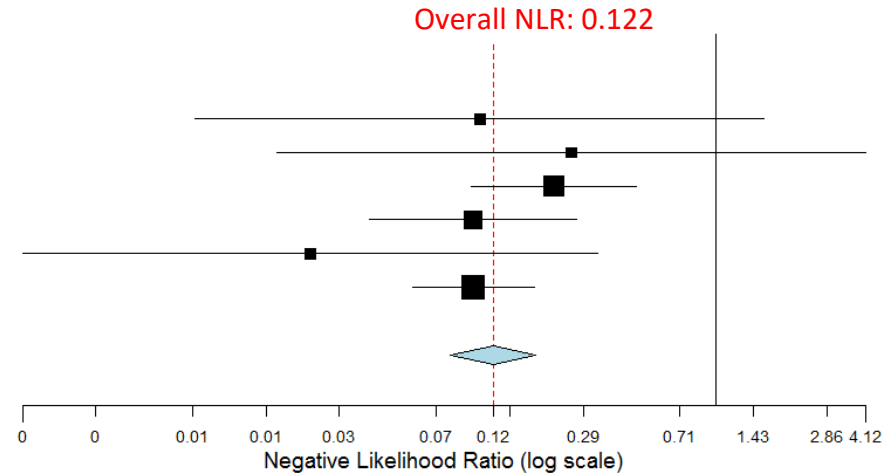

Positive Likelihood Ratio

| Studies                                         | Estimate (95% C.I.)          | (TP * Di-)/(FP * Di+) |
|-------------------------------------------------|------------------------------|-----------------------|
| Akin 2018                                       | 12.600 (0.858, 185.047)      | 24/0                  |
| Bernhardt 2017                                  | 37.500 (2.320, 606.016)      | 96/0                  |
| Dell Aquila 2018                                | 6.094 (2.790, 13.309)        | 585/96                |
| De Vaugelade 2019                               | 5.238 (1.963, 13.980)        | 95/15                 |
| Kim 2019                                        | 25.458 (1.679, 385.928)      | 276/0                 |
| Tam 2019                                        | 1.736 (0.976, 3.085)         | 90/50                 |
| <b>Overall (I<sup>2</sup>=64.3 % , P=0.016)</b> | <b>5.557 (2.352, 13.130)</b> | <b>1166/161</b>       |

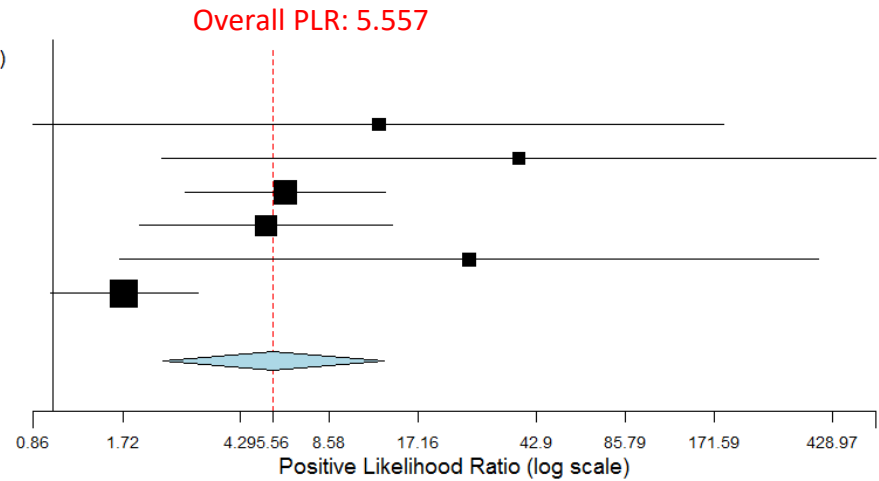

Figure 7. NLR and PLR Forest plots for FDG PET/CT for driveline infection

Negative Likelihood Ratio

Overall NLR: 0.133

| Studies                                      | Estimate (95% C.I.)         | (FN * Di-)/(TN * Di+) |
|----------------------------------------------|-----------------------------|-----------------------|
| Akin 2018                                    | 0.071 (0.005, 0.961)        | 0/21                  |
| Avramovic 2017                               | 0.158 (0.071, 0.349)        | 72/456                |
| Bernhardt 2017                               | 0.128 (0.008, 1.995)        | 18/198                |
| Dell Aquila 2018                             | 0.041 (0.003, 0.644)        | 25/900                |
| De Vaugelade 2019                            | 0.130 (0.089, 0.189)        | 0/44                  |
| Kanapinn 2019                                | 0.022 (0.002, 0.326)        | 0/161                 |
| Kim 2019                                     | 0.026 (0.002, 0.396)        | 0/304                 |
| Tam 2019                                     | 0.150 (0.098, 0.229)        | 0/22                  |
| <b>Overall (I<sup>2</sup>=0 % , P=0.718)</b> | <b>0.133 (0.103, 0.173)</b> | <b>115/2106</b>       |

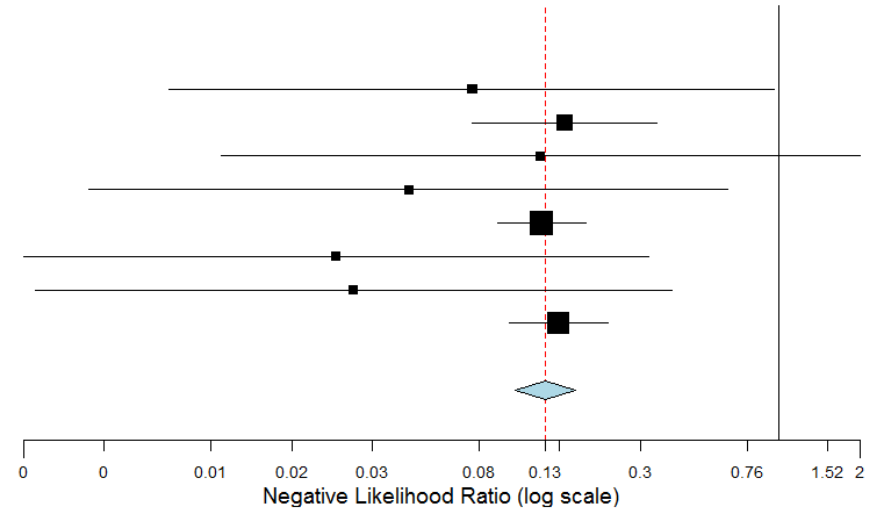

Positive Likelihood Ratio

Overall PLR: 3.934

| Studies                                              | Estimate (95% C.I.)         | (TP * Di-)/(FP * Di+) |
|------------------------------------------------------|-----------------------------|-----------------------|
| Akin 2018                                            | 7.500 (0.558, 100.873)      | 21/0                  |
| Avramovic 2017                                       | 4.200 (1.898, 9.295)        | 504/120               |
| Bernhardt 2017                                       | 33.250 (2.140, 516.717)     | 180/0                 |
| Dell Aquila 2018                                     | 49.892 (3.203, 777.189)     | 875/0                 |
| De Vaugelade 2019                                    | 1.412 (0.966, 2.064)        | 143/99                |
| Kanapinn 2019                                        | 15.667 (1.069, 229.513)     | 161/0                 |
| Kim 2019                                             | 33.150 (2.158, 509.121)     | 304/0                 |
| Tam 2019                                             | 1.327 (0.870, 2.024)        | 88/66                 |
| <b>Overall (I<sup>2</sup>=72.98 % , P&lt; 0.001)</b> | <b>3.934 (1.875, 8.255)</b> | <b>2276/285</b>       |

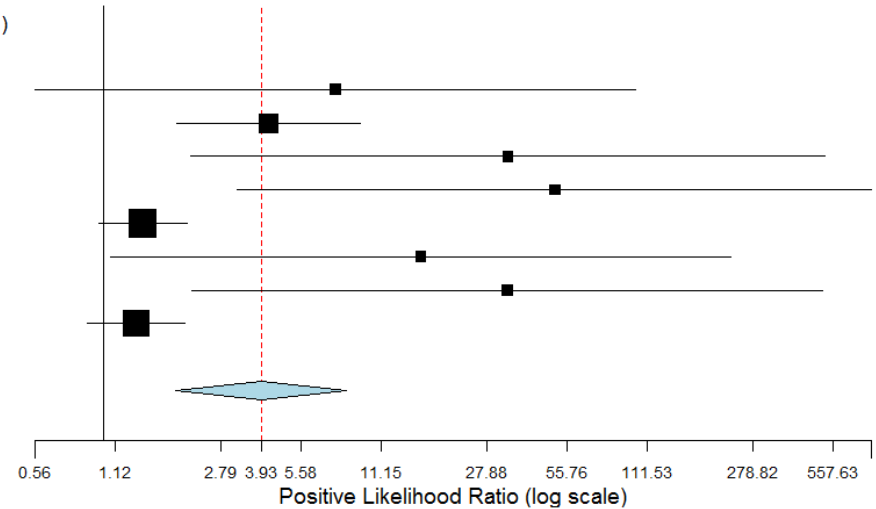

Figure 8. Forest plot Diagnostic Odds Ratio <sup>18</sup>F-FDG PET/CT for LVAD pump/pocket and driveline infection

| Studies                                      | Estimate      | (95% C.I.)              | (TP * TN) / (FP * FN) |
|----------------------------------------------|---------------|-------------------------|-----------------------|
| Akin et al 2018                              | 85.000        | (1.319, 5478.065)       | 16/0                  |
| Avramovic et al 2017                         | 26.600        | (5.589, 126.596)        | 399/15                |
| Bernhardt et al 2017                         | 156.600       | (6.877, 3566.114)       | 182/0                 |
| Dell'Aquila et al - 2 2018                   | 22.500        | (5.542, 91.353)         | 540/24                |
| De Vaugelade et al 2019                      | 40.000        | (1.749, 914.787)        | 40/1                  |
| Kanapinn et al 2019                          | 705.000       | (12.846, 38691.742)     | 161/0                 |
| Kim et al 2019                               | 855.000       | (15.635, 46756.257)     | 196/0                 |
| Tam et al 2019                               | 8.846         | (0.366, 213.798)        | 22/0                  |
| <b>Overall (I<sup>2</sup>=0 % , P=0.445)</b> | <b>38.433</b> | <b>(16.535, 89.335)</b> | <b>1556/40</b>        |

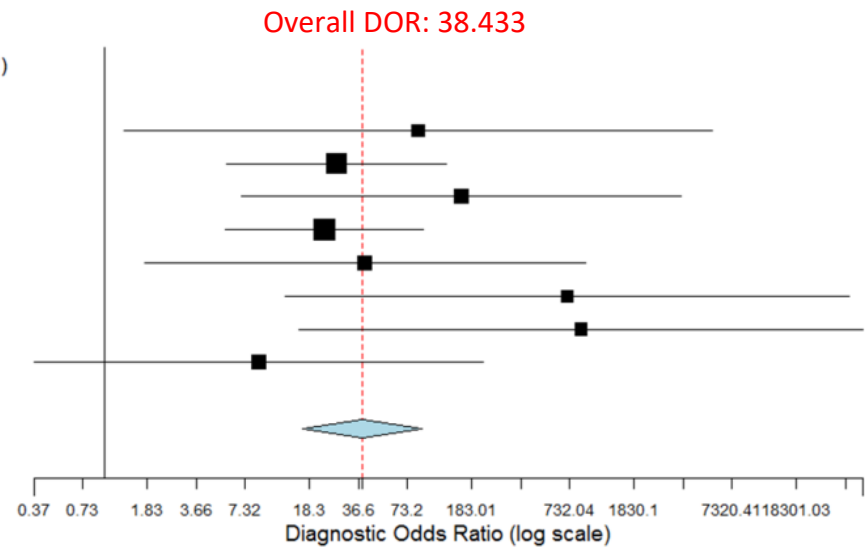

Figure 9. Forest plot Diagnostic Odds Ratio <sup>18</sup>F-FDG PET/CT for driveline infection

| Studies                                          | Estimate      | (95% C.I.)               | (TP * TN) / (FP * FN) |
|--------------------------------------------------|---------------|--------------------------|-----------------------|
| Akin 2018                                        | 105.000       | (1.705, 6464.654)        | 21/0                  |
| Avramovic 2017                                   | 26.600        | (5.589, 126.596)         | 399/15                |
| Bernhardt 2017                                   | 259.000       | (9.659, 6945.214)        | 180/0                 |
| Dell Aquila 2018                                 | 1207.000      | (47.233, 30843.682)      | 875/0                 |
| De Vaugelade 2019                                | 10.895        | (0.518, 229.010)         | 44/0                  |
| Kanapinn 2019                                    | 705.000       | (12.846, 38691.742)      | 161/0                 |
| Kim 2019                                         | 1287.000      | (24.184, 68490.014)      | 304/0                 |
| Tam 2019                                         | 8.846         | (0.366, 213.798)         | 22/0                  |
| <b>Overall (I<sup>2</sup>=38.96 % , P=0.119)</b> | <b>92.457</b> | <b>(22.711, 376.395)</b> | <b>2006/15</b>        |

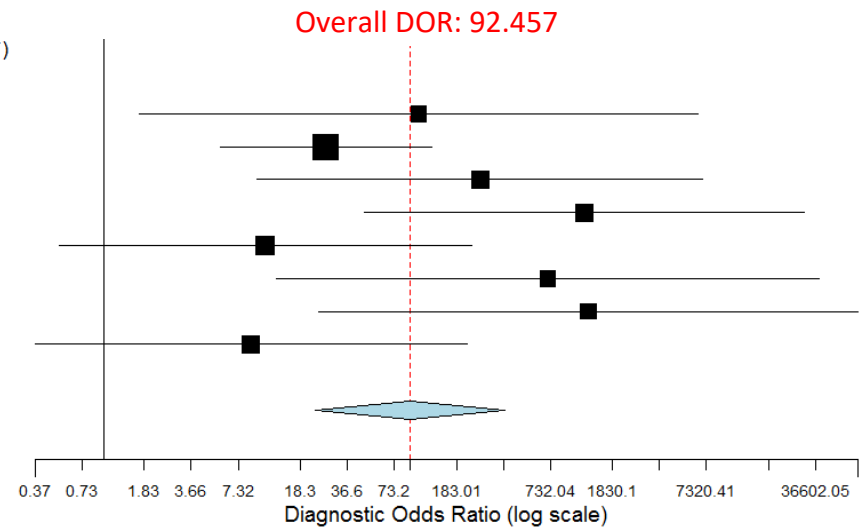

Figure 10 . Forest plot Diagnostic Odds Ratio <sup>18</sup>F-FDG PET/CT for infection of LVAD pump/pocket

| Studies                                      | Estimate (95% C.I.)             | (TP * TN) / (FP * FN) |
|----------------------------------------------|---------------------------------|-----------------------|
| Akin 2018                                    | 117.000 (1.939, 7060.232)       | 24/0                  |
| Bernhardt 2017                               | 147.000 (5.133, 4209.848)       | 96/0                  |
| Dell Aquila 2018                             | 28.167 (6.152, 128.968)         | 507/18                |
| De Vaugelade 2019                            | 51.857 (2.298, 1170.117)        | 80/0                  |
| Kim 2019                                     | 1175.000 (21.966, 62852.646)    | 276/0                 |
| Tam 2019                                     | 17.182 (0.775, 380.840)         | 40/0                  |
| <b>Overall (I<sup>2</sup>=0 % , P=0.552)</b> | <b>49.434 (16.716, 146.187)</b> | <b>1023/18</b>        |

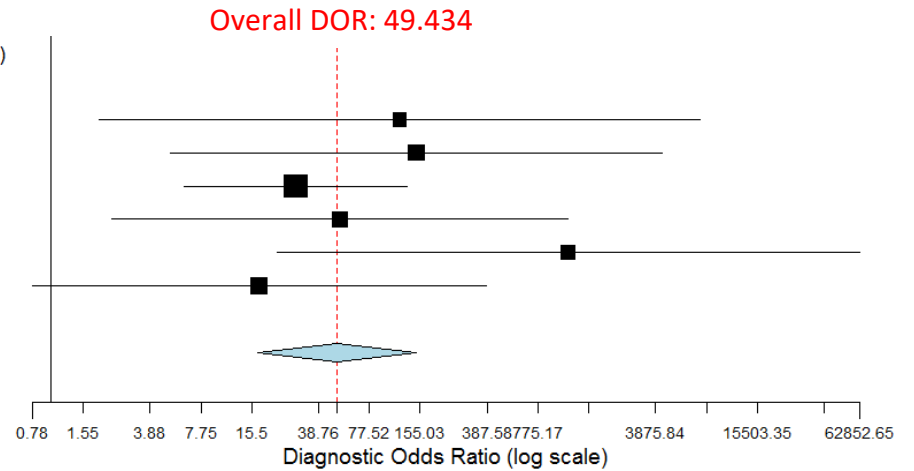



## Search Strings:

Embase: ('left ventricular assist device'/exp OR 'lvad' OR 'left ventricular assist device' OR 'ventricular assist device'/exp OR 'ventricular assist device' OR 'vad' OR 'driveline infection') AND ('infection'/exp OR 'infection' OR 'bacterial endocarditis'/exp OR 'infective endocarditis') AND ('positron emission tomography'/exp OR 'positron emission tomography') NOT ('case report'/exp OR 'case report')

Pubmed: (Left ventricular assist device[tiab] OR LVAD[tiab] OR Ventricular Assist Device[tiab] OR VAD[tiab] OR Driveline infection[tiab]) And (infection[tiab] OR endocarditis[tiab] or Endocarditis[mesh]) AND (Positron emission tomography[tiab] OR PET) NOT (case report[tiab])
